# Supplementary material
Source: Springer Nature journal article supplement (https://www.springermedizin.de/resource/supplementary/12245_2012_113_MOESM1_ESM.pdf/9672802)

## Chest compression only

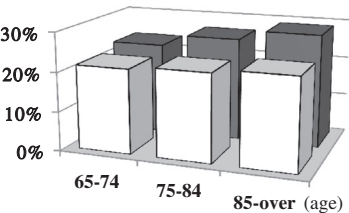

## Conventional CPR

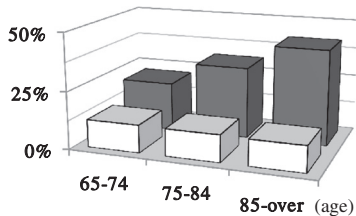

## Survival

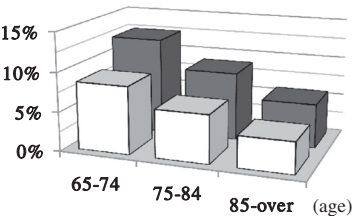

## Favorable CPC

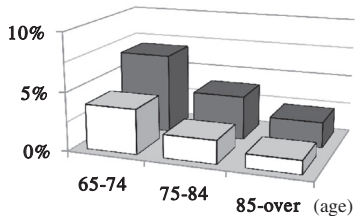

Supplement: MOESM1 [file 9672802]
